# Supplementary material for: A simple and scalable approach towards the preparation of superhydrophobic surfaces – importance of the surface roughness skewness
Source: Royal Society of Chemistry journal article supplement (doi:10.1039/c4ta00366g), 2014-01-01
Supplement: c4ta00366g1.pdf [file c4ta00366g1.pdf]

## A Simple and Scalable Approach towards the Preparation of Superhydrophobic Surfaces – Importance of the Surface Roughness Skewness†

Nicolas D. Boscher,<sup>\*a</sup> Véronique Vaché,<sup>b</sup> Paul Carminati,<sup>a</sup> Patrick Grysan<sup>a</sup> and Patrick Choquet<sup>a</sup>

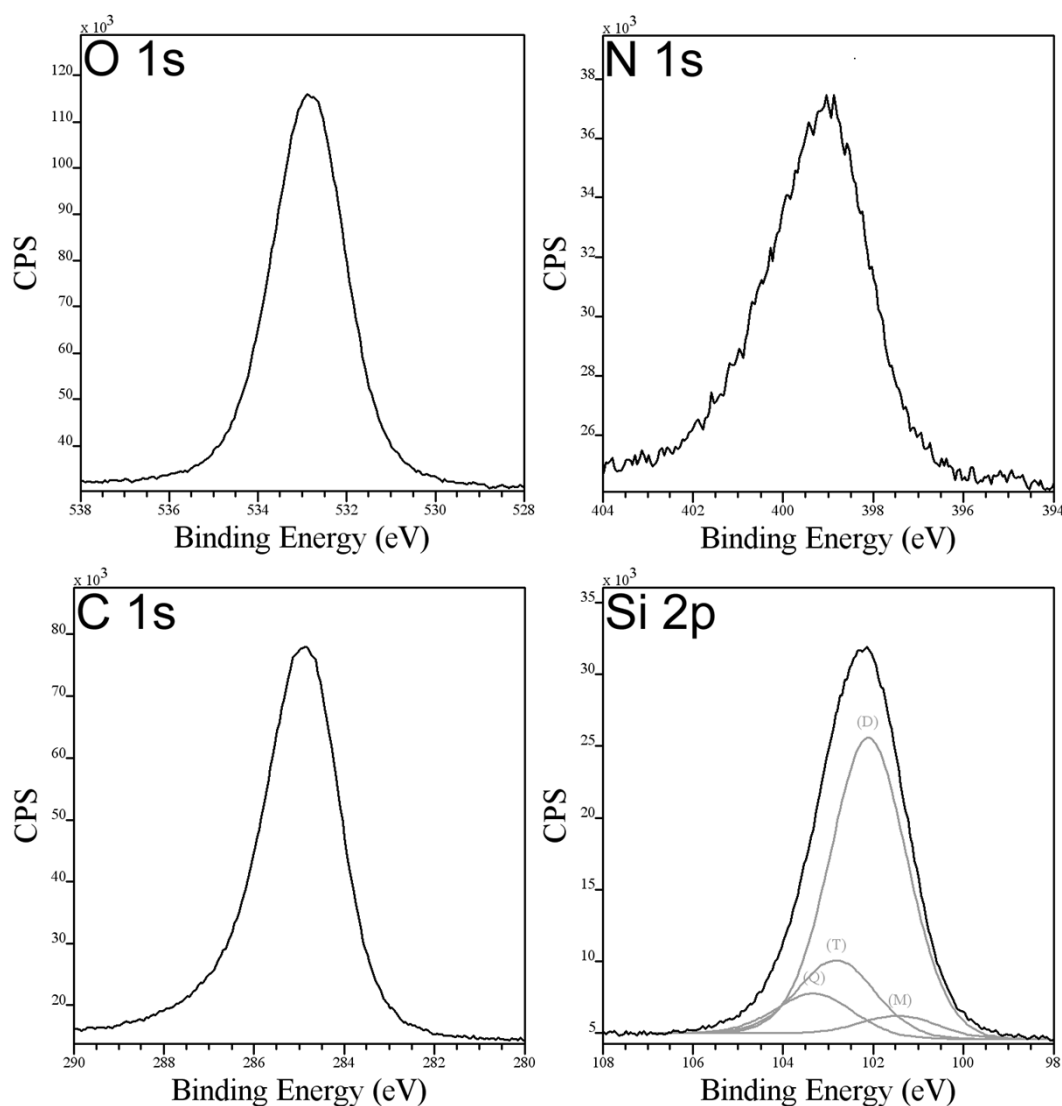

**Figure S1.** XPS of the O 1s, N 1s, C 1s and Si 2p core levels.
